# Supplementary material
Source: MDPI journal article supplement (https://www.mdpi.com/2076-3417/12/24/12987)
Supplement: s1 [file s1]

**Table S1. Analysis of variance (ANOVA) per player and team for A<sub>0</sub> and S<sub>0</sub>: All relevant parameters.**

|           |        | ANOVA A <sub>0</sub> |        |         |         |         | ANOVA S <sub>0</sub> |        |         |         |         |
|-----------|--------|----------------------|--------|---------|---------|---------|----------------------|--------|---------|---------|---------|
|           |        | Df                   | Sum Sq | Mean Sq | F value | p       | Df                   | Sum Sq | Mean Sq | F value | p       |
| Player 1  | Factor | 4                    | 0.526  | 0.1316  | 0.285   | 0.881   | 4                    | 1.667  | 0.4166  | 2.044   | 0.171   |
|           | Error  | 9                    | 4.157  | 0.4619  | -       | -       | 9                    | 1.835  | 0.2038  | -       | -       |
| Player 2  | Factor | 4                    | 0.5084 | 0.1271  | 0.415   | 0.794   | 4                    | 1.521  | 0.3803  | 0.756   | 0.581   |
|           | Error  | 8                    | 2.4507 | 0.3063  | -       | -       | 8                    | 4.022  | 0.5028  | -       | -       |
| Player 3  | Factor | 4                    | 0.991  | 0.2478  | 0.942   | 0.493   | 4                    | 1.0847 | 0.2712  | 2.198   | 0.171   |
|           | Error  | 7                    | 1.841  | 0.2631  | -       | -       | 7                    | 0.8636 | 0.1234  | -       | -       |
| Player 4  | Factor | 4                    | 1.9371 | 0.4843  | 14.5    | 0.003** | 4                    | 1.048  | 0.2621  | 1.303   | 0.367   |
|           | Error  | 6                    | 0.2004 | 0.0334  | -       | -       | 6                    | 1.207  | 0.2011  | -       | -       |
| Player 5  | Factor | 4                    | 2.944  | 0.7361  | 2.169   | 0.19    | 4                    | 1.112  | 0.2780  | 0.727   | 0.605   |
|           | Error  | 6                    | 2.036  | 0.3393  | -       | -       | 6                    | 2.294  | 0.3823  | -       | -       |
| Player 6  | Factor | 4                    | 1.238  | 0.3095  | 0.757   | 0.589   | 4                    | 4.913  | 1.228   | 5.482   | 0.0333* |
|           | Error  | 6                    | 2.452  | 0.4087  | -       | -       | 6                    | 1.344  | 0.224   | -       | -       |
| Player 7  | Factor | 4                    | 0.9146 | 0.2286  | 1.427   | 0.331   | 4                    | 0.8641 | 0.216   | 1.342   | 0.355   |
|           | Error  | 6                    | 0.9612 | 0.1602  | -       | -       | 6                    | 0.9661 | 0.161   | -       | -       |
| Player 8  | Factor | 4                    | 0.9504 | 0.2376  | 5.743   | 0.0412* | 4                    | 4.119  | 1.0297  | 7.187   | 0.0264* |
|           | Error  | 5                    | 0.2068 | 0.04137 | -       | -       | 5                    | 0.716  | 0.1433  | -       | -       |
| Player 9  | Factor | 4                    | 3.068  | 0.7669  | 0.365   | 0.825   | 4                    | 0.8335 | 0.2084  | 0.506   | 0.736   |
|           | Error  | 5                    | 10.491 | 2.0982  | -       | -       | 5                    | 2.0594 | 0.4119  | -       | -       |
| Player 10 | Factor | 4                    | 0.5062 | 0.1266  | 1.164   | 0.443   | 4                    | 0.9492 | 0.2373  | 0.829   | 0.57    |
|           | Error  | 4                    | 0.4348 | 0.1087  | -       | -       | 4                    | 1.1450 | 0.2862  | -       | -       |
| Player 11 | Factor | 4                    | 0.9781 | 0.2445  | 2.164   | 0.21    | 4                    | 4.898  | 1.2244  | 1.968   | 0.238   |
|           | Error  | 5                    | 0.5649 | 0.1130  | -       | -       | 5                    | 3.111  | 0.6221  | -       | -       |
| Player 12 | Factor | 4                    | 1.255  | 0.3138  | 0.284   | 0.875   | 4                    | 2.024  | 0.5059  | 0.668   | 0.647   |
|           | Error  | 4                    | 4.414  | 1.1035  | -       | -       | 4                    | 3.030  | 0.7576  | -       | -       |
| Player 13 | Factor | 4                    | 0.2908 | 0.0727  | 0.805   | 0.581   | 4                    | 0.2744 | 0.06861 | 1.013   | 0.495   |
|           | Error  | 4                    | 0.3611 | 0.09027 | -       | -       | 4                    | 0.2708 | 0.06771 | -       | -       |
| Player 14 | Factor | 4                    | 1.986  | 0.4965  | 0.32    | 0.85    | 4                    | 0.7974 | 0.19935 | 2.581   | 0.231   |
|           | Error  | 3                    | 4.650  | 1.5499  | -       | -       | 3                    | 0.2317 | 0.07725 | -       | -       |
| TEAM      | Factor | 52                   | 17.82  | 0.3426  | 0.759   | 0.85486 | 52                   | 21.001 | 0.4039  | 1.364   | 0.1059  |
|           | Error  | 78                   | 35.22  | 0.4516  | -       | -       | 78                   | 23.096 | 0.2961  | -       | -       |

A<sub>0</sub>: Theoretical maximum acceleration; S<sub>0</sub>: Theoretical maximum speed; Df: Degrees of freedom; Sum Sq: Sum of squares; Mean Sq: Mean of squares; \*: p-value < 0.05; \*\*: p-value < 0.01.
